# Supplementary material
Source: Elsevier journal article supplement (https://cris.unibo.it/retrieve/handle/11585/973284/4635dc8d-4629-4d95-b50b-b91bb250ae37/mmc1.docx)
Supplement: mmc1 [file mmc1.docx]

**Supplementary material**

Supplementary Table 1: Sample size and number of events required to target precise performance measures in an external validation study of the prediction model for urinary tract cancer in haematuria, with an assumed linear prediction that follows a skewed normal distribution and outcome event proportion of 0.28

| Performance measure | Assumed value | Targeted 95% CI width (corresponding standard error) | Sample size: Number of participants (events) required |
| --- | --- | --- | --- |
| Observed:Expected | 1 | 1 (0.051) | 988 (277) |
| Calibration Slope | 0.9 | 0.2 (0.051) | 2254 (631) |
| C-statistic | 0.86 | 0.1 (0.0255) | 270 (76) |
| Net benefit | 0.11 | 0.2 (0.051) | 350 (98) |

Supplementary Table 2: Number of patients in participating countries for the development and validation cohort in alphabetical order. Highlighted in grey are countries that participated in both cohorts, and highlighted in green are countries that were different.

| Development cohort | | Validation cohort | |
| --- | --- | --- | --- |
| Country | Number of patients | Country | Number of patients |
| UK | 4668 | UK | 1,531 |
| Italy | 1207 | Italy | 649 |
| Spain | 663 | Spain | 367 |
| Greece | 50 | Greece | 123 |
| Ireland | 258 | Ireland | 80 |
| Malaysia | 51 | Malaysia | 74 |
| France | 205 | France | 51 |
| Portugal | 187 | Portugal | 40 |
| USA | 643 | USA | 40 |
| Argentina | 113 | Argentina | 20 |
| Canada | 989 | Canada | 20 |
| Turkey | 158 | Turkey | 17 |
| China | 229 | China | 82 |
| Australia | 103 | Germany | 222 |
| Belgium | 40 | Vietnam | 105 |
| Croatia | 50 | Egypt | 44 |
| Czech Republic | 50 | Libya | 27 |
| Denmark | 80 | Sudan | 19 |
| Hungary | 56 | Qatar | 16 |
| Netherlands | 104 | India | 15 |
| Poland | 74 | Kazakhstan | 12 |
| Slovenia | 115 | Nigeria | 11 |
| Japan | 42 | Brazil | 10 |
| Singapore | 50 | Bahrain | 5 |
| Iraq | 46 | Sweden | 1 |
| Uruguay | 51 | Syria | 1 |

Supplementary Table 3: Performance of Machine learning models on development cohort

| **Model** | **AUC** | **Optimism** |
| --- | --- | --- |
| K Nearest Neighbour | 0.80 | 0.1 |
| Multi-layer perceptron | 0.78 | 0.0041 |
| Random Forest | 0.92 | 0.09 |
| XGBoost | 0.87 | 0.07 |

Supplementary Figure 1: Assigned thresholds for risk categories

| Very-low-risk | Low-risk | Intermediate-risk | High-risk |
| --- | --- | --- | --- |
| Less than 1% predicted risk | 1 to less than 5% predicted risk | 5 to 20% predicted risk | Over 20% predicted risk |

Supplementary Figure 2: Linear coefficients of IDENTIFY predictive model and HCRS predictive model

IDENTIFY Risk score = Intercept + 0.07 * (age − mean age) + 0.69 * (male) + 1.99 * (visible haematuria) + 1.06 * (smoker) + 0.70 * (ex-smoker) + 0.72 * (family history of urothelial cancer) − 0.84 * (previous benign haematuria investigation) − 0.74 * (single episode of UTI) − 0.75 * (recurrent episodes of UTI) − 1.57 * (catheter use) − 0.59 * (pelvic radiotherapy history) − 0.17 * (anticoagulation) − 0.32 * (dysuria) − 0.82 * (sex * visible haematuria) − 0.02 * (visible haematuria * [age- − mean age]) − 0.02 * (anticoagulation * [age − mean age])

Haematuria cancer risk score = 0.055*Age + 1.348*Haematuria type + 0.576*Gender + 0.413*Ex‐Smoker + 0.943* Current‐Smoker

Supplementary Figure 3: Calibration plot of the IDENTIFY predictive model on validation cohort

Plot of observed versus predicted cancers. E:O = Predicted:Observed ratio, CITL= Calibration-in-the-large, Slope = Calibration slope, AUC = Area under the receiver operating characteristic curve. Lowess = Locally weighted scatterplot smoothing. Calibration is plotted in groups across the risk spectrum as recommended in the TRIPOD statement. The spike plot denotes the outcome of cancer as 1 and no cancer as 0.
